# Supplementary material for: Copper(ii) complexes of 2-methyl-8-hydroxyquinoline and tri/diimine co-ligand: DFT calculations, DNA and BSA binding, DNA cleavage, cytotoxicity and induction of apoptosis
Source: Royal Society of Chemistry journal article supplement (doi:10.1039/d1nj00392e), 2021-01-01
Supplement: d1nj00392e1.pdf [file d1nj00392e1.pdf]

**Copper(II) Complexes of 2-methyl-8-hydroxyquinoline and tri/diimine Co-ligand: DFT Calculation, DNA and BSA Binding, DNA Cleavage, Cytotoxicity and Induction of Apoptosis**

Somasundaram Sangeetha<sup>1,2</sup> · Tamilarasan Ajaykamal<sup>3</sup> · Mariappan Murali<sup>1\*</sup>

---

Mariappan Murali  
[ma66mu@gmail.com](mailto:ma66mu@gmail.com)

- 1 Coordination and Bioinorganic Chemistry Research Laboratory, Department of Chemistry, National College (Autonomous), Tiruchirappalli 620 001, Tamil Nadu, India
- 2 Department of Chemistry, Tamilavel Umamaheswaranar Karanthai Arts College, Thanjavur 613 002, Tamil Nadu, India
- 3 School of Chemistry, Bharathidasan University, Tiruchirappalli 620 024, Tamil Nadu, India

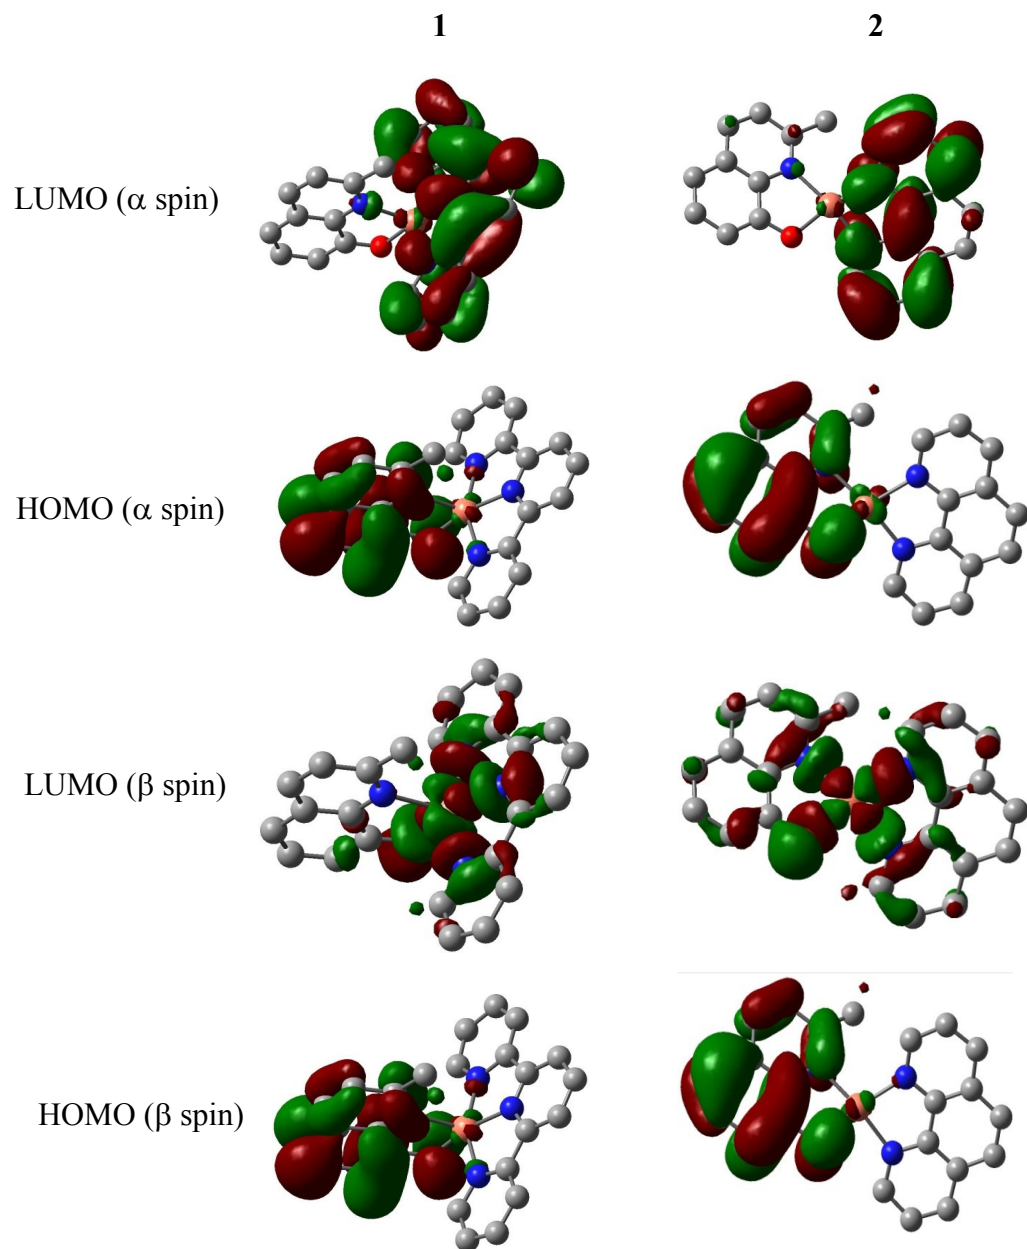

**Fig. S1** Computed frontier molecular orbitals of complexes  $[\text{Cu}(\text{terpy})(\text{mq})]^{1+}$  **1** and  $[\text{Cu}(\text{phen})(\text{mq})]^{1+}$  **2** calculated at the B3LYP 6-31G/ LANL2DZ levels.

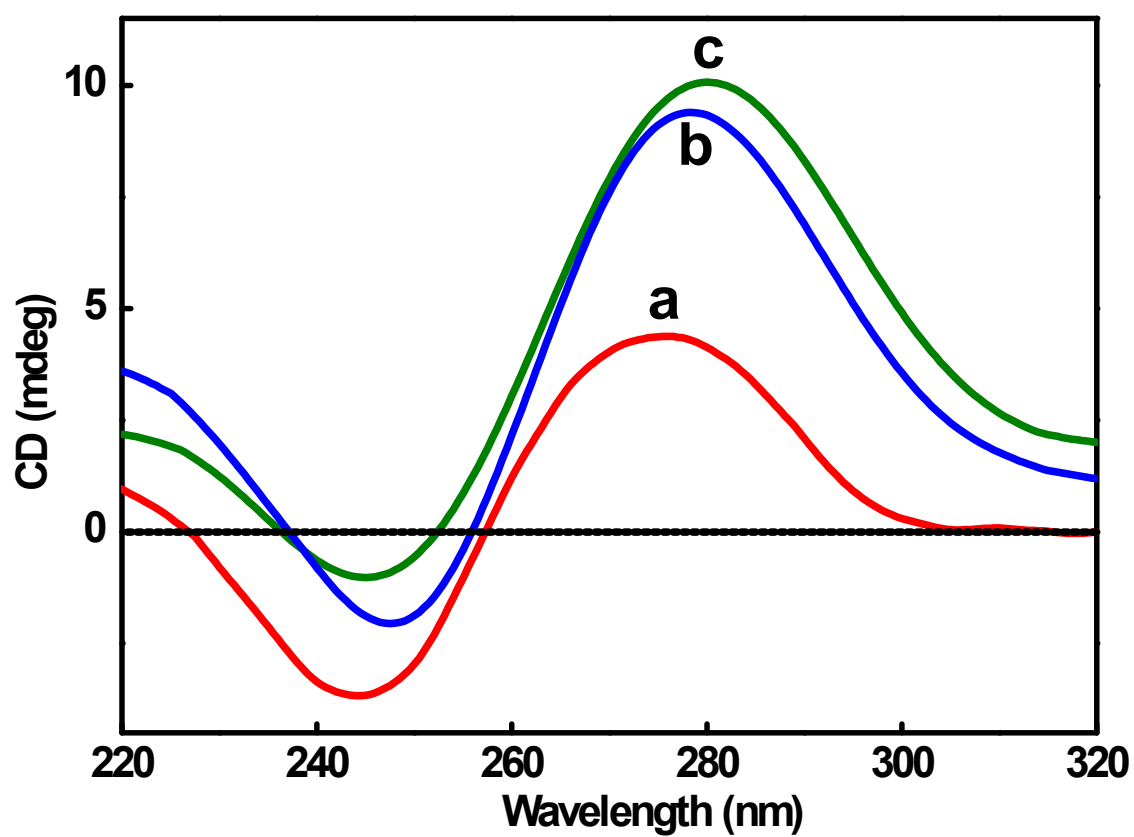

**Fig. S2** Circular dichroism spectra of CT DNA in 2% DMF/5mM Tris-HCl/50 mM NaCl buffer at pH 7.1 and 25 °C in absence (a) and presence of **1** (b) and **2** (c) at 1/R value of 3.

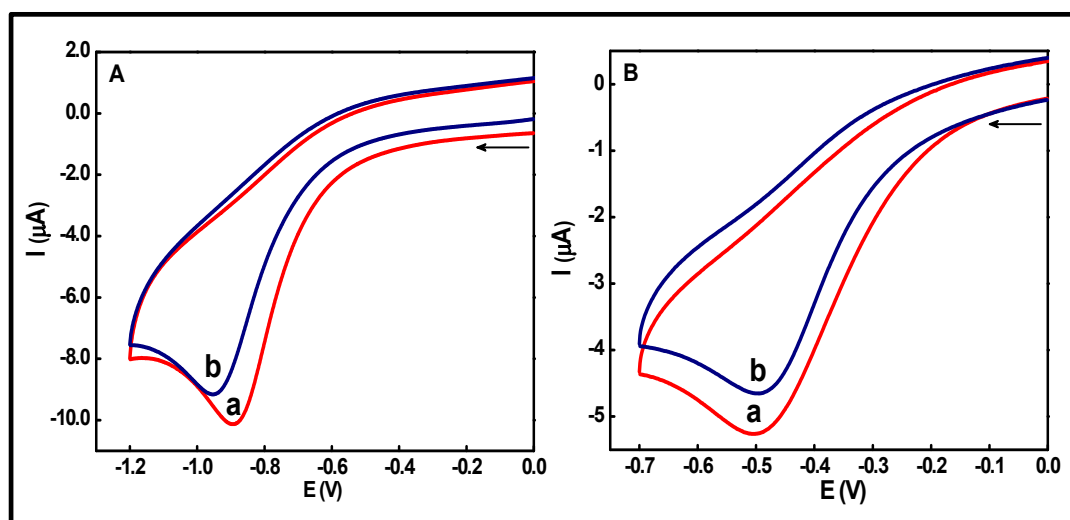

**Fig. S3** Cyclic voltammograms of **1** (left, **A**) and **2** (right, **B**) (0.5 mM) in the absence (a) and presence (b) of CT DNA ( $R = 5$ ) at  $25.0 \pm 0.2$  °C at  $50 \text{ mV s}^{-1}$  scan rate in 2% DMF/5mM Tris-HCl/50 mM NaCl buffer at pH 7.1.

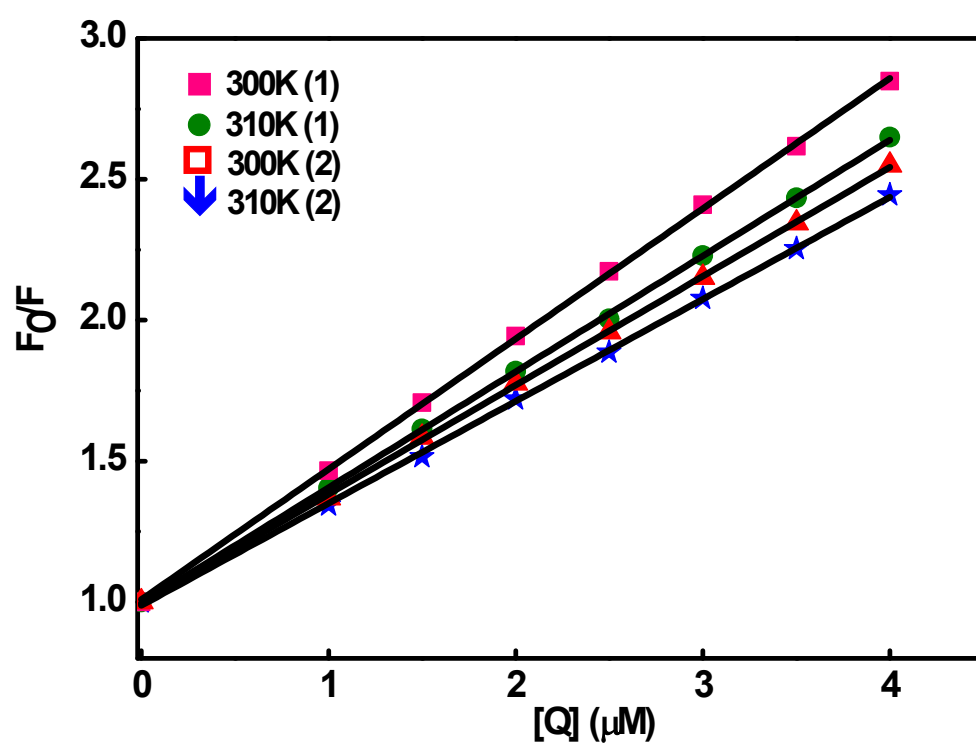

**Fig. S4** The Stern-Volmer plots of BSA at different temperatures for addition of **1** and **2**.  $\lambda_{\text{ex}} = 280 \text{ nm}$ ;  $\text{pH} = 7.4$ .

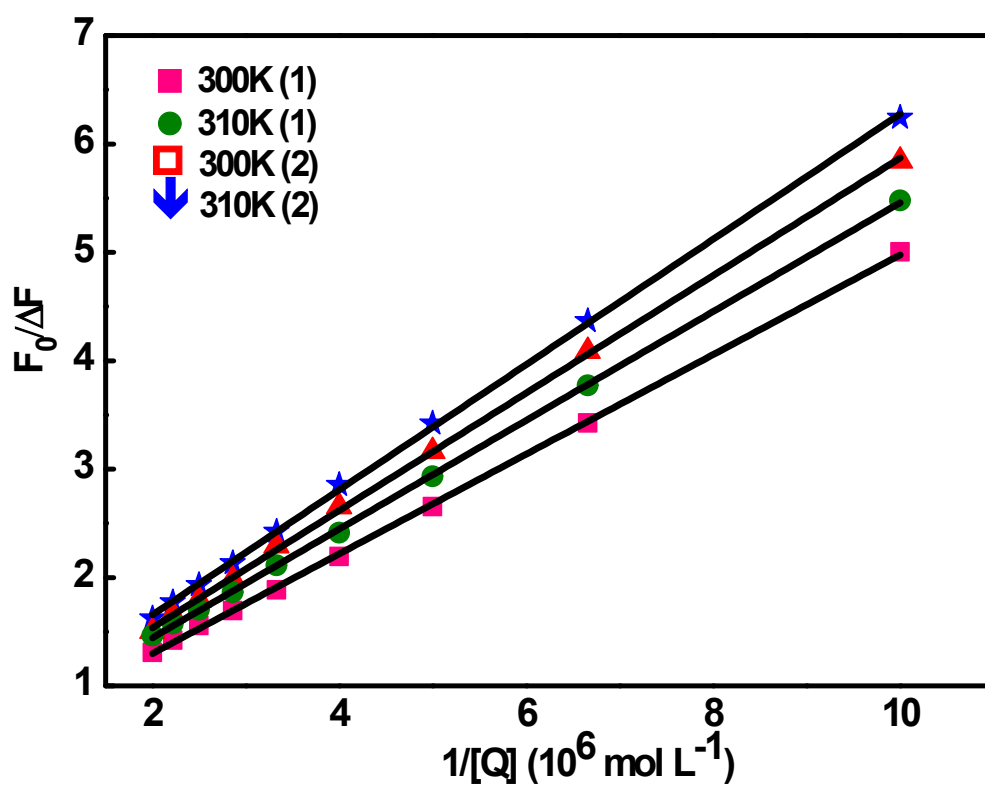

**Fig. S5** The modified Stern-Volmer plots of BSA at different temperatures for addition of **1** and **2**.  $\lambda_{\text{ex}} = 280 \text{ nm}$ ;  $\text{pH} = 7.4$ .

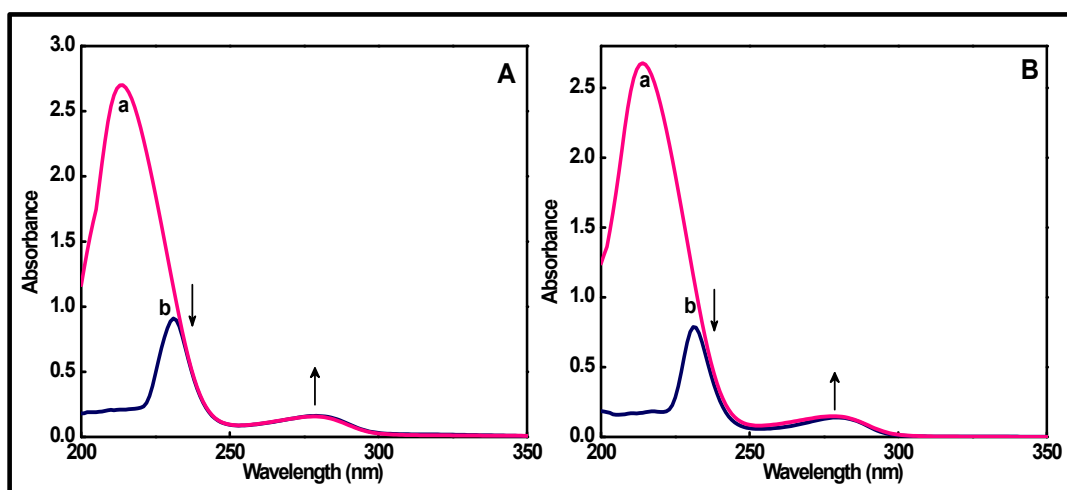

**Fig. S6** UV-Vis absorption spectra of BSA in the absence and presence of **1** (left, **A**) and **2** (right, **B**). (a) Absorption spectrum of BSA. (b) Absorption spectrum of BSA in the presence of **1** and **2** at the same concentration,  $[BSA] = [Cu\ complex] = 3.5 \times 10^{-6}\ mol\ L^{-1}$ .

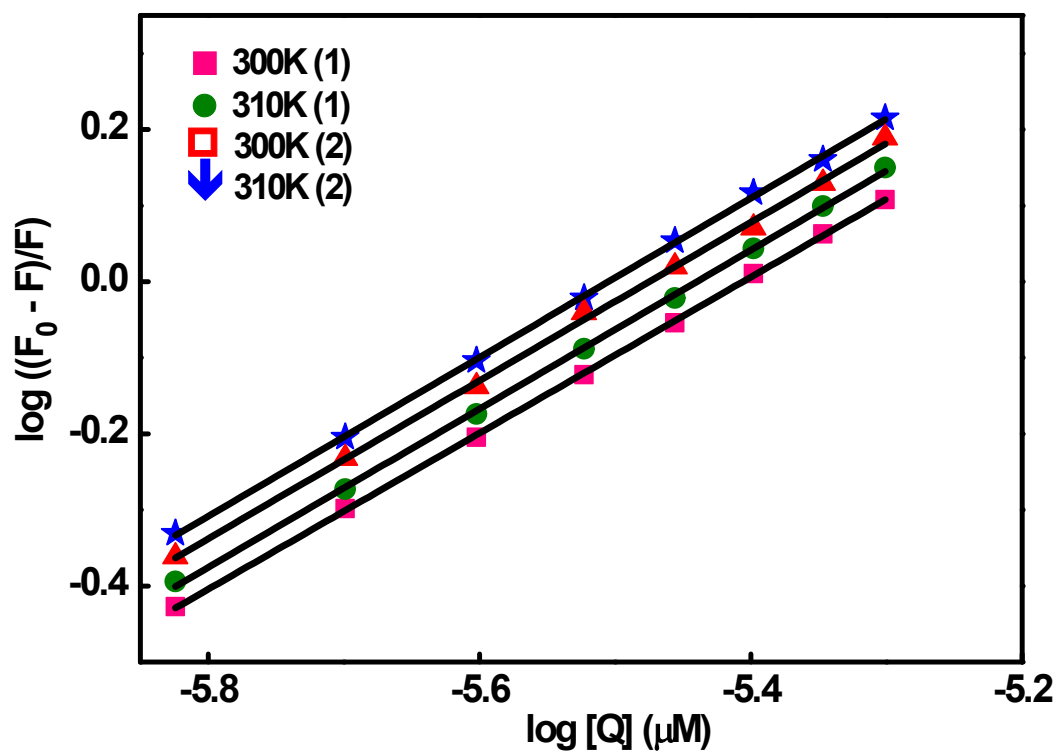

Fig. S7 Double-log plot of quenching effect of 1 and 2 on BSA fluorescence at pH = 7.4.



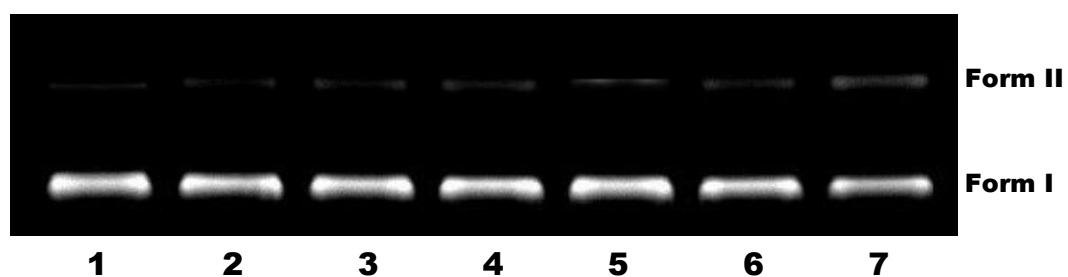

**Fig. S8** Agarose gel showing cleavage of 20  $\mu\text{M}$  SC  $\phi\text{X174}$  RF DNA incubated with **1** in 0.1 M phosphate buffer (pH 7.2) at 37  $^{\circ}\text{C}$  for 1 h. Lane 1, DNA; Lanes 2-7, DNA + **1** (10,20,40,60,80,100  $\mu\text{M}$  respectively). Form I and II are supercoiled and nicked circular forms of DNA respectively.

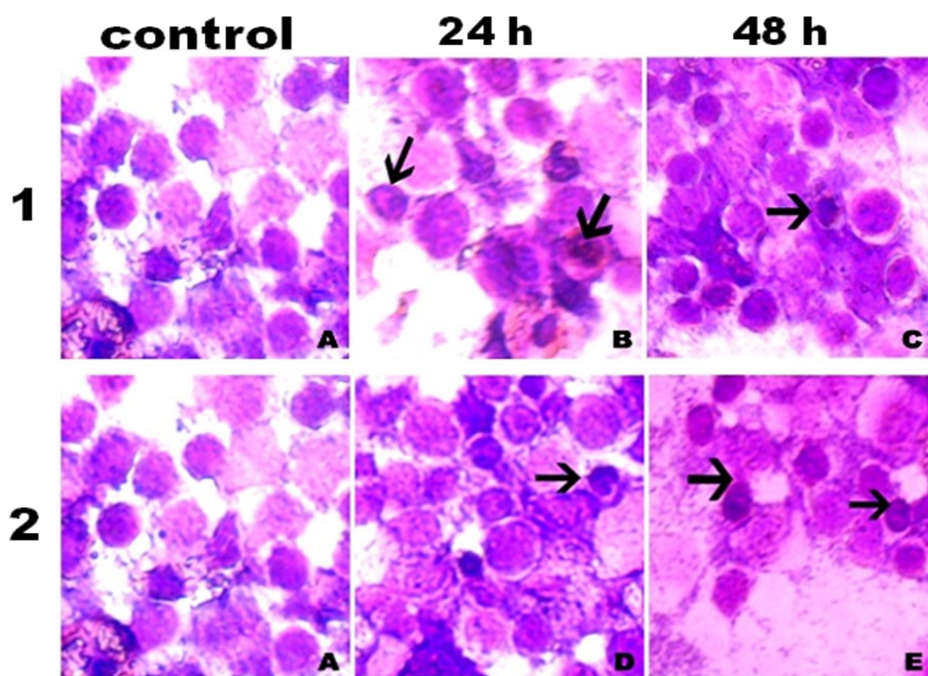

**Fig. S9.** Giemsa staining of MCF7 breast cancer cells untreated with **1** and **2** (**A**), treated with **1** and **2** at 24 (**B** and **D**) and 48 h (**C** and **E**) of incubation.

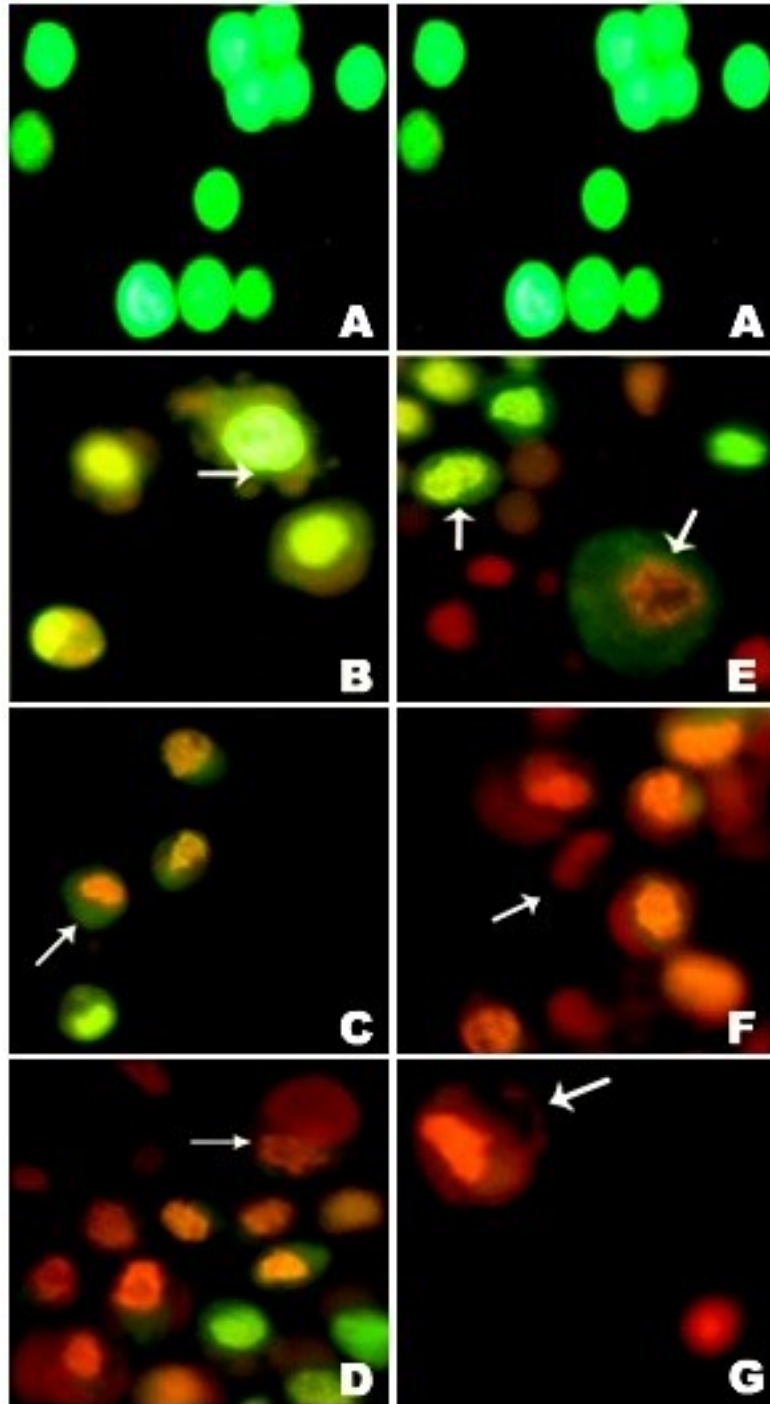

**Fig. S10** AO/EB staining of MCF7 breast cancer cells untreated with **1** (**A**), treated with **1** at 24 (**B**, **C**, **D**) and 48 h (**E**, **F**, **G**) of incubation (arrow head indicate chromatin fragmentation, chromatin condensation and late apoptosis indication of apoptotic bodies)

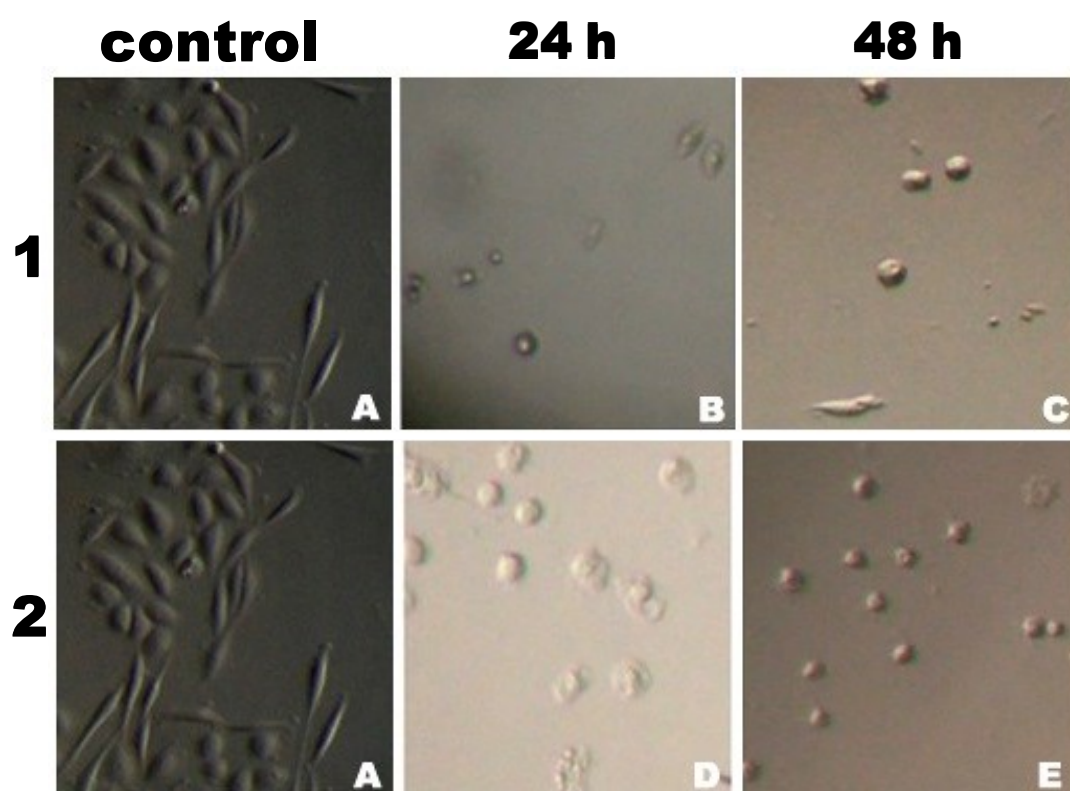

**Fig. S11** Phase contrast of MCF7 breast cancer cells untreated with **1** and **2** (**A**), treated with **1** and **2** at 24 h of incubation (**B** and **D**) and 48 h of incubation (**C** and **E**).

**Table S1.** Selected crystal data and structure refinement parameters for **1**

---

|                                                          |                                                                     |
|----------------------------------------------------------|---------------------------------------------------------------------|
| Formula                                                  | C <sub>25</sub> H <sub>19</sub> N <sub>4</sub> ClO <sub>5</sub> Cu  |
| Formula weight                                           | 554.53                                                              |
| Temperature (K)                                          | 293(2)                                                              |
| Wavelength (Å)                                           | 0.71069                                                             |
| Crystal system                                           | Triclinic                                                           |
| Space group                                              | <i>P</i> -1                                                         |
| <i>a</i> (Å)                                             | 7.3527(8)                                                           |
| <i>b</i> (Å)                                             | 12.8535(14)                                                         |
| <i>c</i> (Å)                                             | 13.2223(15)                                                         |
| $\alpha$ (°)                                             | 75                                                                  |
| $\beta$ (°)                                              | 79.635(2)                                                           |
| $\gamma$ (°)                                             | 87                                                                  |
| <i>V</i> (Å) <sup>3</sup> , <i>Z</i>                     | 1188.3(2), 2                                                        |
| <i>D</i> <sub>calc</sub> (g cm <sup>-3</sup> )           | 1.550                                                               |
| $\mu$ (mm <sup>-1</sup> )                                | 1.077                                                               |
| <i>F</i> (000)                                           | 566                                                                 |
| Crystal size (mm)                                        | 0.18 x 0.10 x 0.09                                                  |
| $\theta$ (°)                                             | 1.62-29.01                                                          |
| Index ranges                                             | -10 ≤ <i>h</i> ≤ 10,<br>-17 ≤ <i>k</i> ≤ 17,<br>-18 ≤ <i>l</i> ≤ 17 |
| Reflections collected                                    | 17029                                                               |
| Independent reflections                                  | 6274                                                                |
| Reflections observed [ <i>I</i> > 2σ( <i>I</i> )]        | 4623                                                                |
| <i>R</i> <sub>int</sub>                                  | 0.0251                                                              |
| GOF                                                      | 1.006                                                               |
| <i>R</i> <sub>1</sub> [ <i>I</i> > 2σ( <i>I</i> )]       | 0.0341                                                              |
| w <i>R</i> <sub>2</sub> [ <i>I</i> > 2σ( <i>I</i> )]     | 0.0890                                                              |
| <i>R</i> <sub>1</sub> , w <i>R</i> <sub>2</sub> all data | 0.0481/0.0939                                                       |

---

**Table S2.** Electrochemical data<sup>a</sup> for the copper(II) complexes at 25.0 ± 0.2 °C

| Complexes | R | E <sub>pc</sub> (V) | E <sub>pa</sub> (V) | E <sub>1/2</sub> (V) |                  | ΔE <sub>p</sub><br>(mV) | i <sub>pa</sub> / i <sub>pc</sub> | D (10 <sup>-6</sup><br>cm <sup>2</sup> s <sup>-1</sup> ) | K <sub>+</sub> / K <sub>2+</sub> |
|-----------|---|---------------------|---------------------|----------------------|------------------|-------------------------|-----------------------------------|----------------------------------------------------------|----------------------------------|
|           |   |                     |                     | CV                   | DPV <sup>b</sup> |                         |                                   |                                                          |                                  |
| 1         | 0 | -0.895              | -0.674              | -0.784               | -0.805           | 221                     | 0.52                              | 6.59                                                     |                                  |
|           | 5 | -0.953              | -0.623              | -0.788               | -0.799           | 330                     | 0.54                              | 6.02                                                     | 1.30                             |
| 2         | 0 | -0.504              | -0.312              | -0.408               | -0.413           | 192                     | 0.62                              | 7.62                                                     |                                  |
|           | 5 | -0.501              | -0.295              | -0.398               | -0.390           | 206                     | 0.57                              | 7.45                                                     | 2.30                             |

<sup>a</sup>Measured vs. SCE electrode; scan rate: 50 mV s<sup>-1</sup>, supporting electrolyte 2% DMF/5mM Tris-HCl/50mM NaCl; complex concentration: 2.5 × 10<sup>-4</sup> M.

<sup>b</sup>Differential pulse voltammetry (DPV), scan rate: 2 mV s<sup>-1</sup>, pulse height 50 mV.

## Calculations of BSA binding parameters

Fluorescence quenching property can be described by the Stern-Volmer equation [1]:

$$F_0/F = 1 + K_{SV}[Q] = 1 + k_q\tau_0[Q]$$

where  $F_0$  and  $F$  are the steady-state fluorescence intensities in the absence and the presence of quencher, respectively.  $K_{SV}$  is the Stern-Volmer quenching constant and  $[Q]$  is the concentration of quencher. The plot of  $F_0/F$  versus  $[Q]$  shows the value of  $K_{SV}$ . According to the above equation

$$K_{SV} = k_q/\tau_0$$

where  $K_q$  is the quenching rate constant and  $\tau_0$  is the fluorescence lifetime of protein in the absence of quencher, the value of  $\tau_0$  is considered to be  $10^{-8}$  s [2].

The binding constant ( $K_b$ ) and the numbers of binding sites ( $n$ ) can be determined using the following equation [3]:

$$\log[F_0-F/F] = \log K_b + n \log[Q]$$

where  $K_b$  is the binding constant, reflecting the degree of interaction of the BSA and complex, and  $n$  is the number of binding sites. The plots of  $\log[(F_0-F)/F]$  versus  $\log[Q]$  gives a straight line. The values of  $n$  and  $K_b$  can be calculated from the slope and intercept of the linear plot respectively.

The thermodynamic parameters can be calculated from the following Van't Hoff equations [4, 5] to elucidate the binding forces between complex and BSA.

$$\ln(K_2/K_1) = (1/T_1 - 1/T_2) \Delta H^\circ/R$$

$$\Delta G^\circ = \Delta H^\circ - T\Delta S^\circ = -RT \ln K$$

where  $K_1$  and  $K_2$  are equilibrium binding constants at temperature  $T_1$  and  $T_2$ , respectively, and  $R$  is the gas constant.

## References

1. Lakowicz JR (2006) Principles of fluorescence spectroscopy, 3rd ed. (New York: Springer Science+Business Media).
2. Lakowicz JR, Webber G (1973) Biochemistry 12:4161-4170.
3. Divsalar A, Bagheri MJ, Saboury AA, Mansoori-Torshizi H, Amani M (2009) J. Phys. Chem. B 113:14035-14042.
4. Wang T, Zhao Z, Wei B, Zhang L, Ji L (2010) J. Mol. Struct. 970:128-133.
5. Bi S, Sun Y, Qiao C, Zhang H, Liu C (2009) J. Lumin. 129:541-547.
